# Supplementary material for: Long-term trends in total inorganic nitrogen and sulfur deposition in the US from 1990 to 2010
Source: Copernicus journal article supplement (doi:10.5194/acp-18-9091-2018), 2018-06-28
Supplement: Supplementary file 1 [file acp-18-9091-2018-supplement.pdf]

Supplement of Atmos. Chem. Phys., 18, 9091–9106, 2018  
<https://doi.org/10.5194/acp-18-9091-2018-supplement>  
© Author(s) 2018. This work is distributed under  
the Creative Commons Attribution 4.0 License.

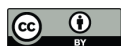

*Supplement of*

## **Long-term trends in total inorganic nitrogen and sulfur deposition in the US from 1990 to 2010**

**Yuqiang Zhang et al.**

*Correspondence to:* Yuqiang Zhang ([yuqiangzhang.thu@gmail.com](mailto:yuqiangzhang.thu@gmail.com)) and Rohit Mathur ([mathur.rohit@epa.gov](mailto:mathur.rohit@epa.gov))

The copyright of individual parts of the supplement might differ from the CC BY 4.0 License.

## US mask for ecoregion level 1

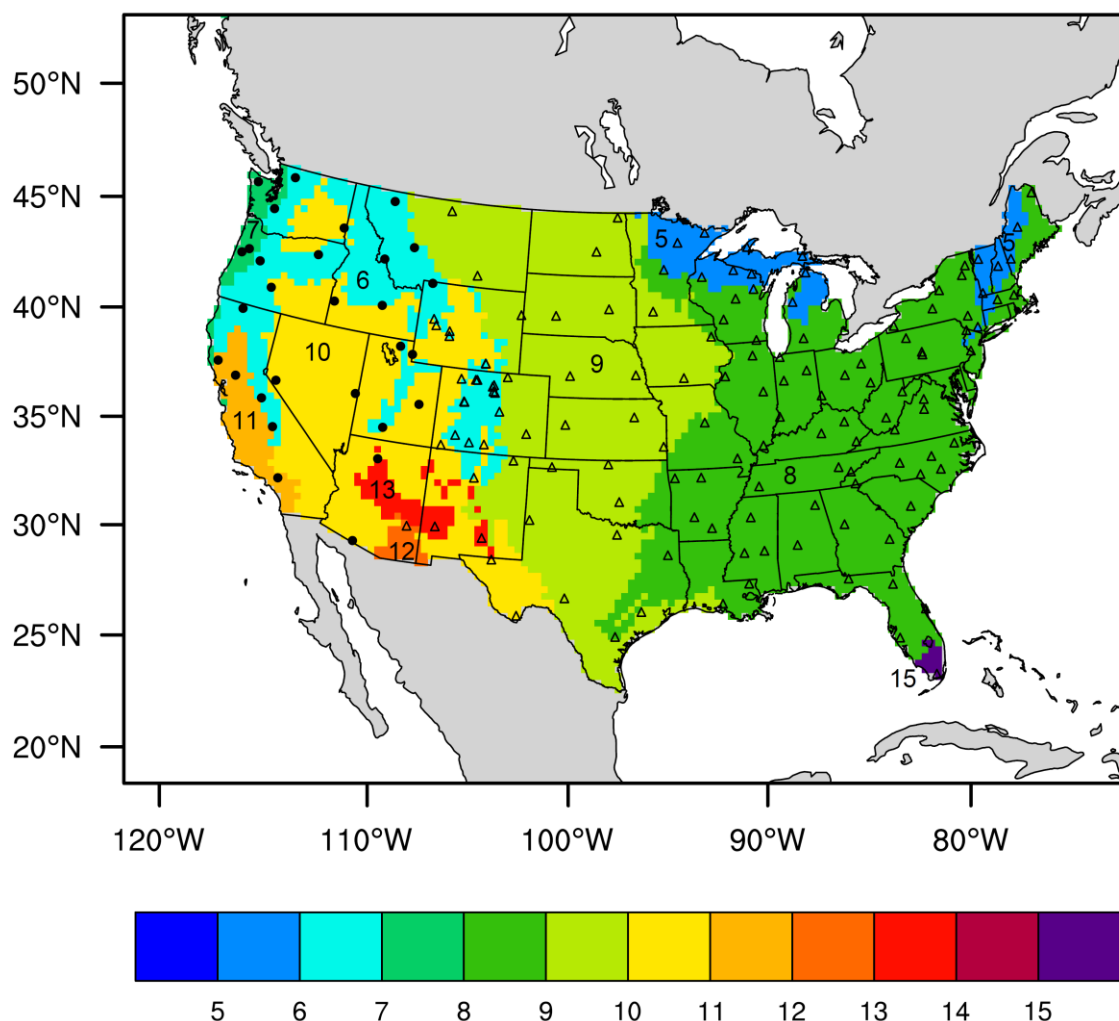

Figure S1. The 10 Level I ecoregions in the continental US: 5 = Northern Forests, 6 = Northwestern Forested Mountains, 7 = Marine West Coast Forest, 8 = Eastern Temperate Forests, 9 = Great Plains, 10 = North American Deserts, 11 = Mediterranean California, 12 = Southern Semi-arid Highlands, 13 = Temperate Sierras, and 15 = Tropical Wet Forests. The black circles are the NADP stations in the western US, and the up triangles are the NADP stations in the eastern US, as used in Figs. S2-S3, and Figs. 1-3 in the main manuscript. For detailed info of the NADP observations, please also see Table S2.

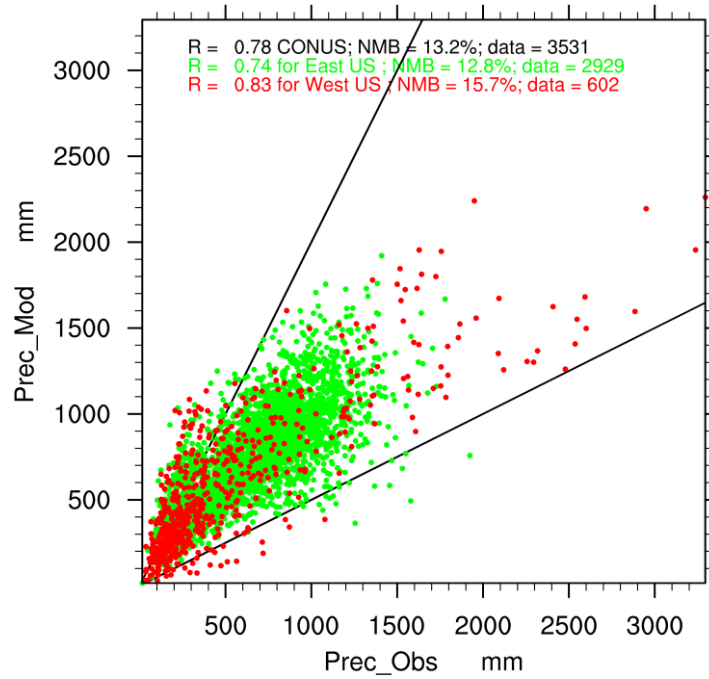

Figure S2. Scatter plots for the annual accumulated precipitation between observation (Prec\_Obs) and model results (Prec\_Mod) from 1990 to 2010 for 170 valid sites with 3531 valid data. The data at each NADP site is assumed valid only if at least 18 years of observation data are available with 75% annual coverage for that site. Each point in the plots represents the annual precipitation for a given site and year. Note that the annual accumulated precipitation may not be the actual annual totals because of missing data in the observations. The lines are for the 1:2 and 2:1 ratio.

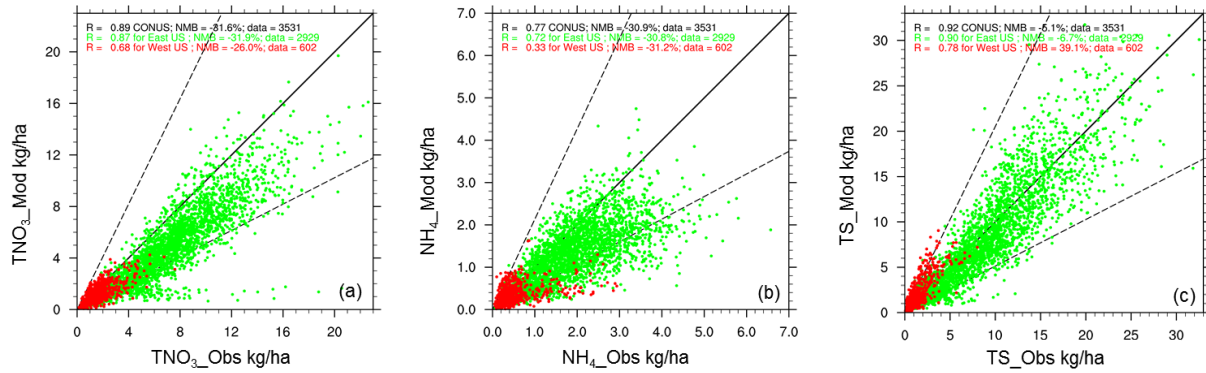

Figure S3. Scatter plots for the annual accumulated deposition (total oxidized nitrogen (TNO<sub>3</sub>, a), reduced nitrogen (NH<sub>x</sub>, b), and total sulfate (TS, c)) without considering the precipitation adjustment between observation (TNO<sub>3</sub>\_Obs, NH<sub>4</sub>\_Obs, TS\_Obs) and model results (TNO<sub>3</sub>\_Mod, NH<sub>4</sub>\_Mod, TS\_Mod) from 1990 to 2010 for 170 valid sites with 3531 valid data. The site in NADP is assumed valid if only at least 18 years of observation data is available with 75% annual coverage for the site. Note that the annual accumulated deposition may not be the actual annual totals because of the missing data in the observation. The green color is for the eastern US, and the red color is for the western US, with the dashed line for the 1:2 and 2:1 ratio, and the solid line for the 1:1 ratio.

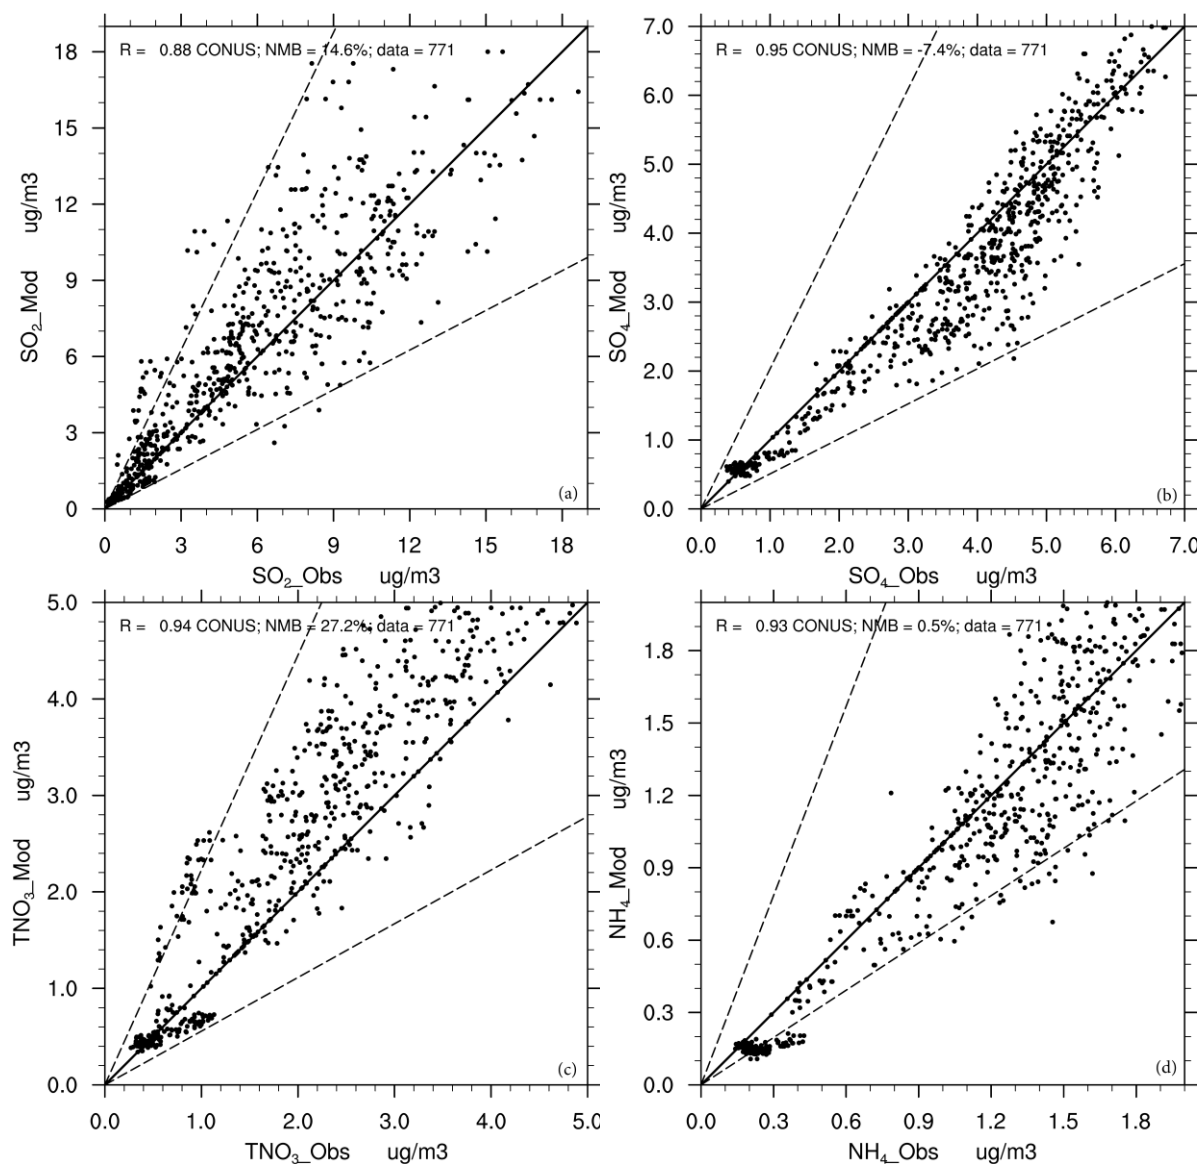

Figure S4. Scatter plots for the annual air concentration (sulfur dioxide (SO<sub>2</sub>, a), particulate sulfate (SO<sub>4</sub>, b), total particulate nitrate (TNO<sub>3</sub>= NO<sub>3</sub> +HNO<sub>3</sub>, c), and particulate ammonium (NH<sub>4</sub>, d) between the observational and model results from 1990 to 2010 for 39 valid sites with 771 valid data. The site in CASTNET is assumed valid if only at least 18 years of observation data is available with 75% annual coverage for the site. The dashed lines are for the 1:2 and 2:1 ratio, and the solid line for the 1:1 ratio.

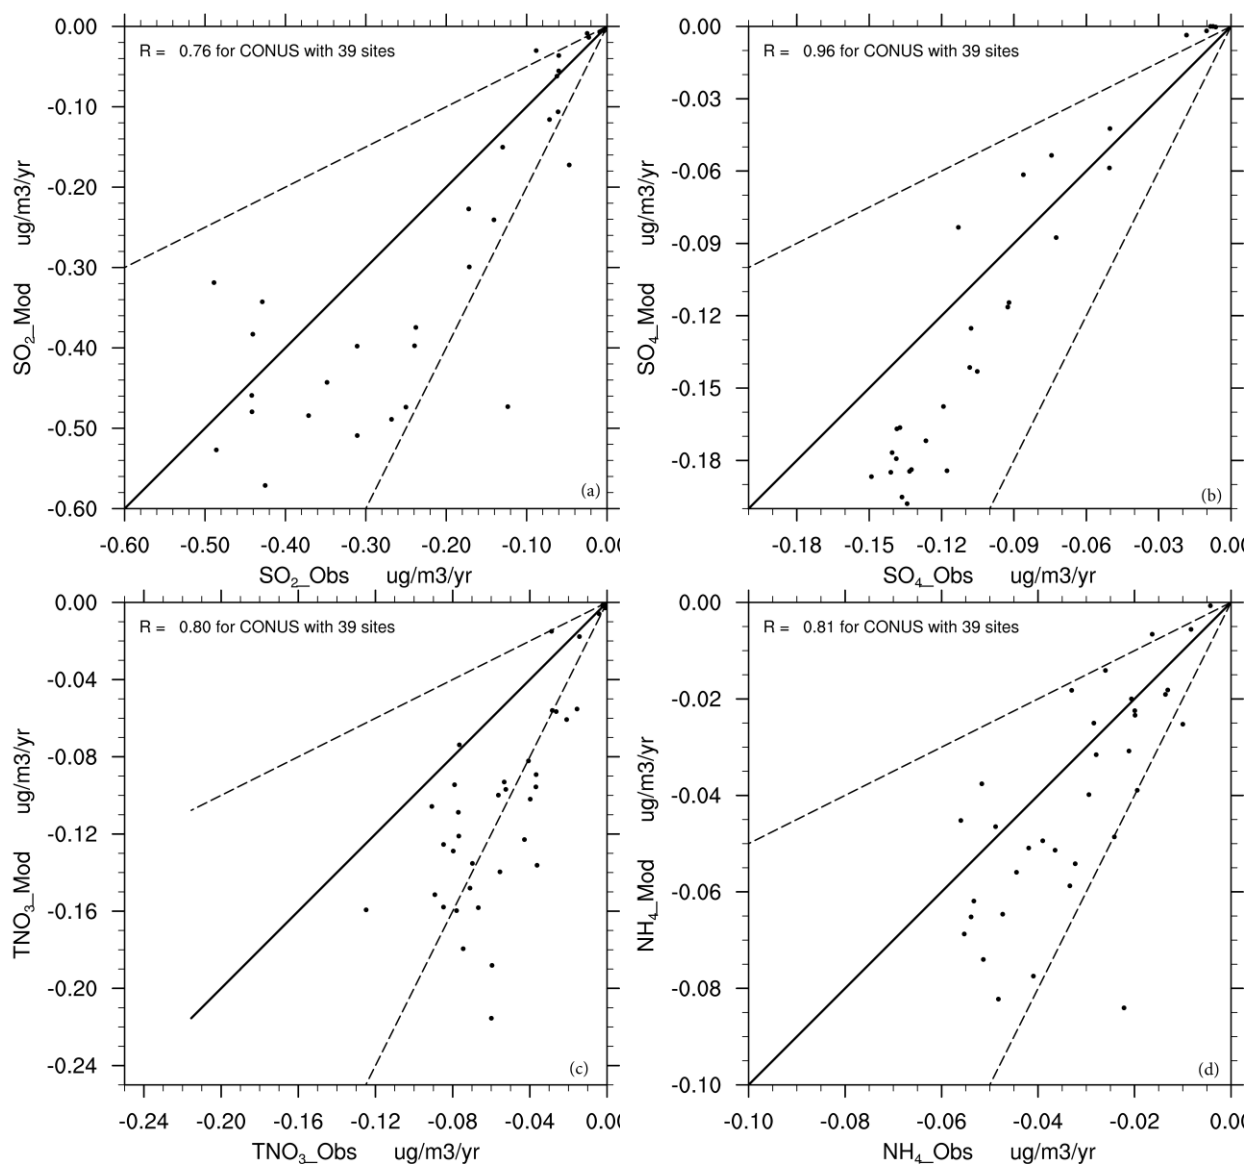

Figure S5. Comparison of the CASTNET trend for each valid site between the model values and observational for annual air concentration (sulfur dioxide (SO<sub>2</sub>, a), particulate sulfate (SO<sub>4</sub>, b), total particulate nitrate (TNO<sub>3</sub>= NO<sub>3</sub>+HNO<sub>3</sub>, c), and particulate ammonium (NH<sub>4</sub>, d). Each CASTNET site is assumed to be valid for our analysis only if at least 18 years of observation data are available at that site and the data coverage is at least 75% for each year. The dashed line is for the 1:2 and 2:1 ratio, and the solid line for the 1:1 ratio.

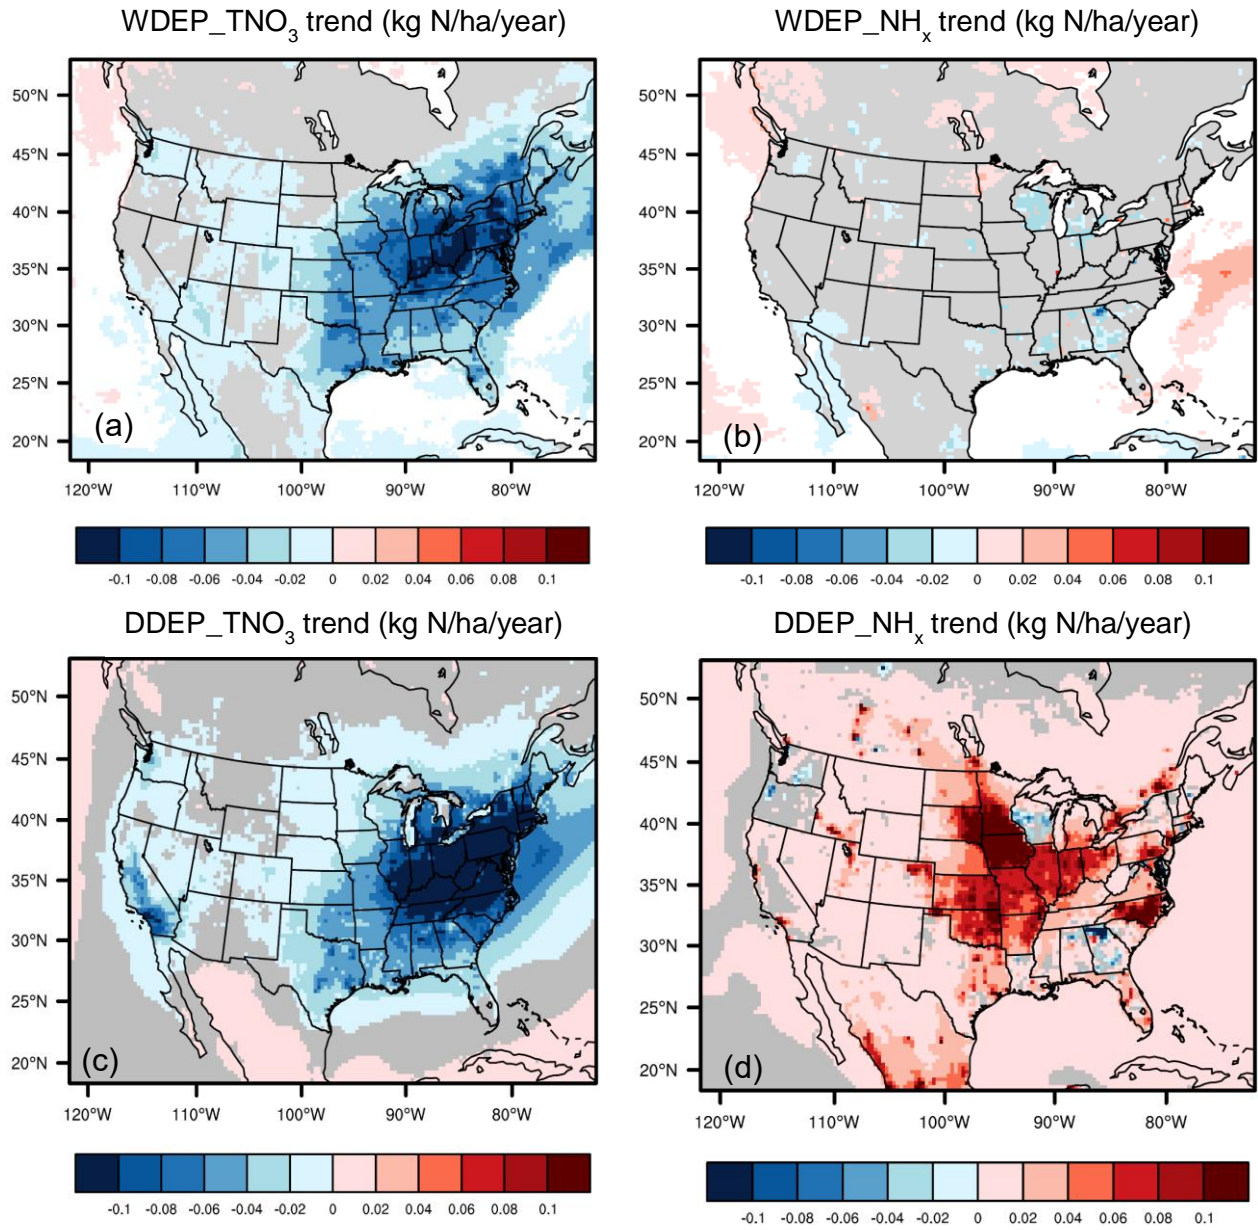

Figure S6. The spatial distribution of the wet deposition (a,b, WDEP) and dry deposition (c,d, DDEP) trends for oxidized nitrogen ( $\text{TNO}_3$ , a,c) and reduced nitrogen ( $\text{NH}_x$ , b,d).

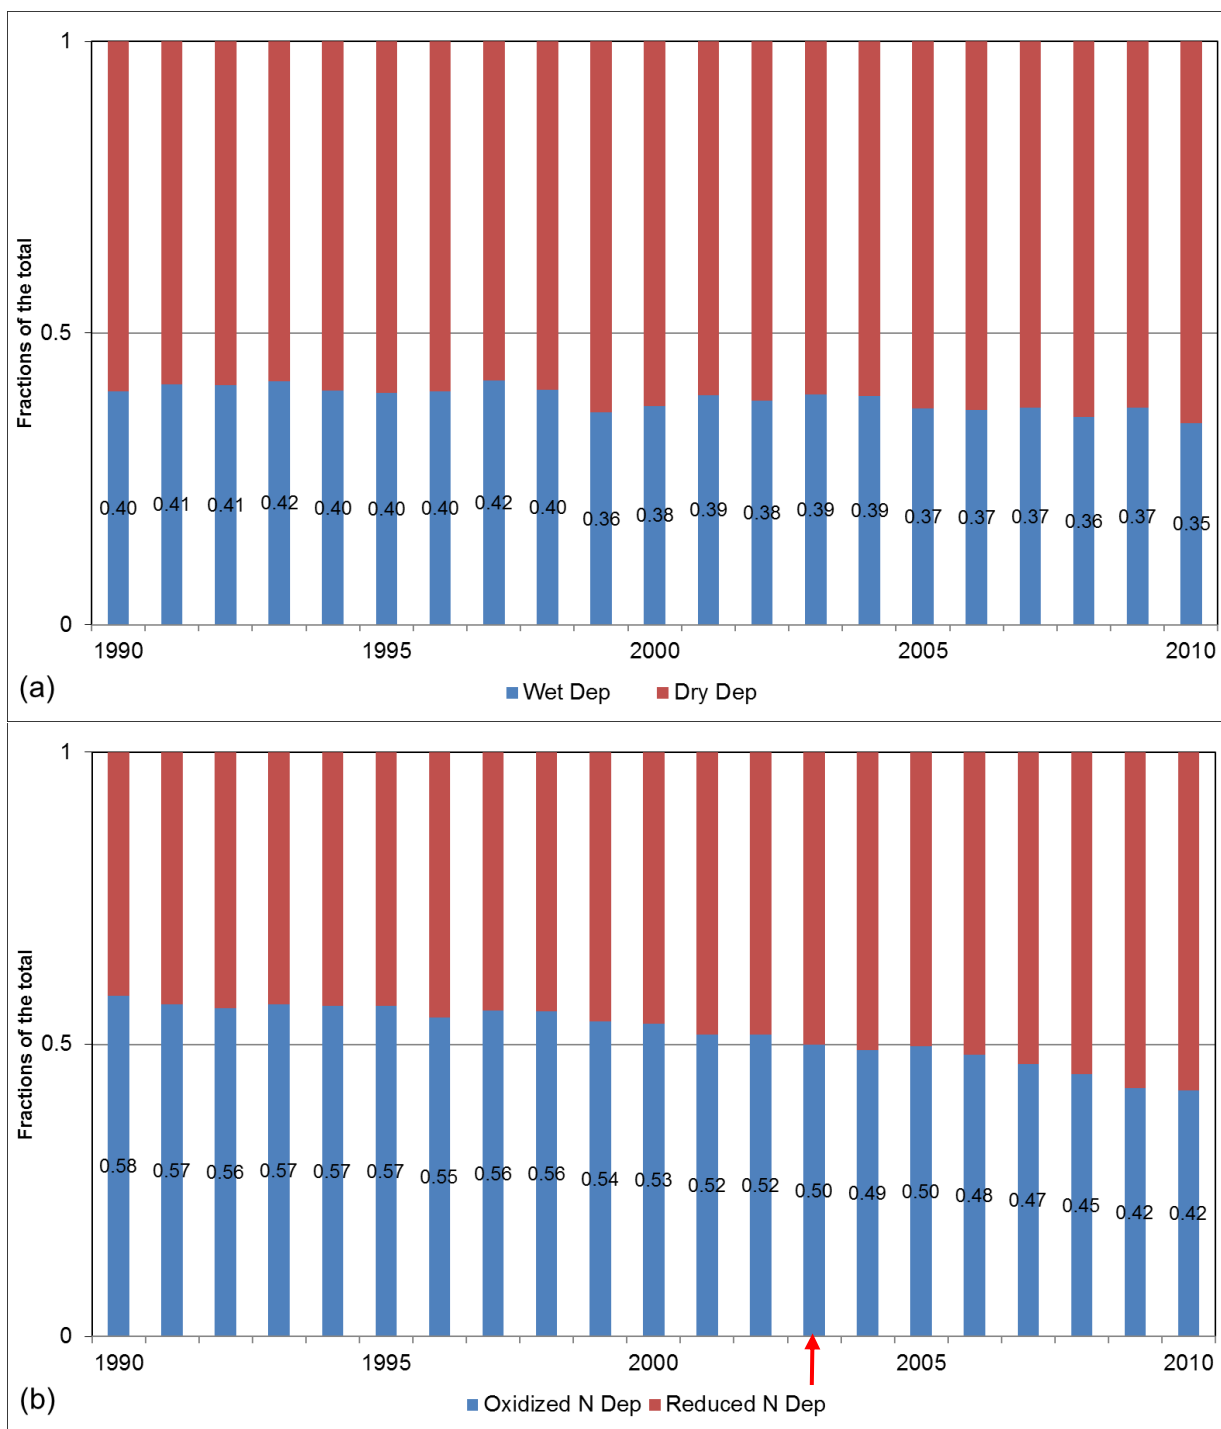

Figure S7. Interannual variability of the fractions of the total inorganic nitrogen deposition in the US from 1990 to 2010, including (a) wet versus dry, and (b) oxidized versus reduced. The red arrow points to the year 2003.

Table S1. List of configurations for the coupled WRF-CMAQ model from 1990 to 2010.

| Parameter                   | Configuration       |
|-----------------------------|---------------------|
| Emission                    | Xing et al. (2013)  |
| Aerosol Chemistry           | AERO6               |
| Gas-phase Chemistry         | Carbon Bond 05      |
| Chemical Boundary Condition | Xing et al. (2015a) |
| Cumulus                     | Kain-Fritsch 2      |
| Land Surface Model          | Pleim-Xiu           |
| Land Use Category           | NLCD 50             |
| Microphysics                | Morrison 2-moment   |
| Radiation                   | RRTMG SW & LW       |
| Planetary Boundary Layer    | ACM2 (Pleim, 2007)  |



Table S2. Location of the NADP observation networks with years of valid data, and the ecoregion definitions.

| Site ID | Site Name                                   | Valid Years | Ecoregion Level I               |
|---------|---------------------------------------------|-------------|---------------------------------|
| AL10    | Black Belt Research & Extension Center      | 21          | Eastern Temperate Forests       |
| AL99    | Sand Mountain Research & Extension Center   | 21          | Eastern Temperate Forests       |
| AR02    | Warren 2WSW                                 | 21          | Eastern Temperate Forests       |
| AR03    | Caddo Valley                                | 21          | Eastern Temperate Forests       |
| AR16    | Buffalo National River-Buffalo Point        | 21          | Eastern Temperate Forests       |
| AR27    | Fayetteville                                | 20          | Eastern Temperate Forests       |
| AZ03    | Grand Canyon National Park-Hopi Point       | 21          | North American Deserts          |
| AZ06    | Organ Pipe Cactus National Monument         | 20          | North American Deserts          |
| AZ99    | Oliver Knoll                                | 20          | Southern Semi-arid Highlands    |
| CA42    | Tanbark Flat                                | 21          | Mediterranean California        |
| CA45    | Hopland                                     | 21          | Mediterranean California        |
| CA75    | Sequoia National Park-Giant Forest          | 21          | Mediterranean California        |
| CA76    | Montague                                    | 21          | Northwestern Forested Mountains |
| CA88    | Davis                                       | 21          | Mediterranean California        |
| CA99    | Yosemite National Park-Hodgdon Meadow       | 21          | Northwestern Forested Mountains |
| CO00    | Alamosa                                     | 20          | North American Deserts          |
| CO01    | Las Animas Fish Hatchery                    | 21          | Great Plains                    |
| CO02    | Niwot Saddle                                | 21          | Northwestern Forested Mountains |
| CO08    | Four Mile Park                              | 21          | Northwestern Forested Mountains |
| CO15    | Sand Spring                                 | 21          | North American Deserts          |
| CO19    | Rocky Mountain National Park-Beaver Meadows | 21          | Northwestern Forested Mountains |
| CO21    | Manitou                                     | 21          | Northwestern Forested Mountains |
| CO22    | Pawnee                                      | 21          | Great Plains                    |
| CO91    | Wolf Creek Pass                             | 18          | Northwestern Forested Mountains |
| CO92    | Sunlight Peak                               | 18          | Northwestern Forested Mountains |
| CO93    | Buffalo Pass - Dry Lake                     | 21          | Northwestern Forested Mountains |
| CO94    | Sugarloaf                                   | 21          | Northwestern Forested Mountains |
| CO96    | Molas Pass                                  | 21          | Northwestern Forested Mountains |
| CO97    | Buffalo Pass - Summit Lake                  | 20          | Northwestern Forested Mountains |
| CO98    | Rocky Mountain National Park-Loch Vale      | 21          | Northwestern Forested Mountains |
| CO99    | Mesa Verde National Park-Chapin Mesa        | 21          | North American Deserts          |
| FL03    | Bradford Forest                             | 21          | Eastern Temperate Forests       |
| FL11    | Everglades National Park-Research Center    | 21          | Tropical Wet Forests            |
| FL14    | Quincy                                      | 21          | Eastern Temperate Forests       |
| FL41    | Verna Well Field                            | 21          | Eastern Temperate Forests       |
| FL99    | Kennedy Space Center                        | 21          | Eastern Temperate Forests       |
| GA20    | Bellville                                   | 19          | Eastern Temperate Forests       |
| GA41    | Georgia Station                             | 21          | Eastern Temperate Forests       |
| IA08    | Big Springs Fish Hatchery                   | 20          | Eastern Temperate Forests       |
| IA23    | McNay Research Center                       | 21          | Great Plains                    |
| ID03    | Craters of the Moon National Monument       | 21          | Northwestern Forested Mountains |
| ID11    | Reynolds Creek                              | 21          | North American Deserts          |
| IL11    | Bondville                                   | 21          | Eastern Temperate Forests       |

|      |                                               |    |                                 |
|------|-----------------------------------------------|----|---------------------------------|
| IL18 | Shabbona                                      | 21 | Eastern Temperate Forests       |
| IL63 | Dixon Springs Agricultural Center             | 21 | Eastern Temperate Forests       |
| IL78 | Monmouth                                      | 21 | Eastern Temperate Forests       |
| IN20 | Roush Lake                                    | 21 | Eastern Temperate Forests       |
| IN22 | Southwest Purdue Agriculture Center           | 21 | Eastern Temperate Forests       |
| IN34 | Indiana Dunes National Lakeshore              | 21 | Eastern Temperate Forests       |
| IN41 | Agronomy Center for Research and Extension    | 21 | Eastern Temperate Forests       |
| KS07 | Farlington Fish Hatchery                      | 21 | Great Plains                    |
| KS31 | Konza Prairie                                 | 21 | Great Plains                    |
| KS32 | Lake Scott State Park                         | 21 | Great Plains                    |
| KY03 | Mackville                                     | 21 | Eastern Temperate Forests       |
| KY22 | Lilley Cornett Woods                          | 21 | Eastern Temperate Forests       |
| KY35 | Clark State Fish Hatchery                     | 21 | Eastern Temperate Forests       |
| LA12 | Iberia Research Station                       | 20 | Eastern Temperate Forests       |
| LA30 | Southeast Research Station                    | 21 | Eastern Temperate Forests       |
| MA01 | North Atlantic Coastal Lab                    | 21 | Eastern Temperate Forests       |
| MA08 | Quabbin Reservoir                             | 21 | Eastern Temperate Forests       |
| MA13 | East                                          | 20 | Eastern Temperate Forests       |
| MD13 | Wye                                           | 21 | Eastern Temperate Forests       |
| ME00 | Caribou                                       | 20 | Eastern Temperate Forests       |
| ME02 | Bridgton                                      | 21 | Northern Forests                |
| ME09 | Greenville Station                            | 21 | Northern Forests                |
| ME98 | Acadia National Park-McFarland Hill           | 21 | Northern Forests                |
| MI09 | Douglas Lake                                  | 21 | Northern Forests                |
| MI26 | Kellogg Biological Station                    | 20 | Eastern Temperate Forests       |
| MI53 | Wellston                                      | 21 | Northern Forests                |
| MI98 | Raco                                          | 20 | Northern Forests                |
| MI99 | Chassell                                      | 21 | Northern Forests                |
| MN16 | Marcell Experimental Forest                   | 21 | Northern Forests                |
| MN18 | Fernberg                                      | 21 | Northern Forests                |
| MN23 | Camp Ripley                                   | 21 | Northern Forests                |
| MN27 | Lamberton                                     | 21 | Great Plains                    |
| MO03 | Ashland Wildlife Area                         | 20 | Eastern Temperate Forests       |
| MO05 | University Forest                             | 21 | Eastern Temperate Forests       |
| MS10 | Clinton                                       | 21 | Eastern Temperate Forests       |
| MS19 | Newton                                        | 21 | Eastern Temperate Forests       |
| MS30 | Coffeeville                                   | 21 | Eastern Temperate Forests       |
| MT00 | Little Bighorn Battlefield National Monument  | 21 | Great Plains                    |
| MT05 | Glacier National Park-Fire Weather Station    | 21 | Northwestern Forested Mountains |
| MT07 | Clancy                                        | 21 | Northwestern Forested Mountains |
| MT97 | Lost Trail Pass                               | 20 | Northwestern Forested Mountains |
| MT98 | Havre - Northern Agricultural Research Center | 21 | Great Plains                    |
| NC03 | Lewiston                                      | 21 | Eastern Temperate Forests       |
| NC25 | Coweeta                                       | 21 | Eastern Temperate Forests       |
| NC34 | Piedmont Research Station                     | 21 | Eastern Temperate Forests       |
| NC35 | Clinton Crops Research Station                | 21 | Eastern Temperate Forests       |
| NC36 | Jordan Creek                                  | 21 | Eastern Temperate Forests       |
| NC41 | Finley Farm                                   | 21 | Eastern Temperate Forests       |
| ND08 | Icelandic State Park                          | 21 | Great Plains                    |

|      |                                                          |    |                                 |
|------|----------------------------------------------------------|----|---------------------------------|
| ND11 | Woodworth                                                | 21 | Great Plains                    |
| NE15 | Mead                                                     | 21 | Great Plains                    |
| NE99 | North Platte Agricultural Experiment Station             | 21 | Great Plains                    |
| NH02 | Hubbard Brook                                            | 21 | Northern Forests                |
| NJ99 | Washington Crossing                                      | 21 | Eastern Temperate Forests       |
| NM01 | Gila Cliff Dwellings National Monument                   | 20 | Temperate Sierras               |
| NM07 | Bandelier National Monument                              | 21 | Northwestern Forested Mountains |
| NM08 | Mayhill                                                  | 20 | Temperate Sierras               |
| NM12 | Capulin Volcano National Monument                        | 21 | Great Plains                    |
| NV03 | Smith Valley                                             | 21 | North American Deserts          |
| NV05 | Great Basin National Park-Lehman Caves                   | 21 | North American Deserts          |
| NY08 | Aurora Research Farm                                     | 21 | Eastern Temperate Forests       |
| NY10 | Chautauqua                                               | 20 | Eastern Temperate Forests       |
| NY20 | Huntington Wildlife                                      | 21 | Eastern Temperate Forests       |
| NY52 | Bennett Bridge                                           | 21 | Eastern Temperate Forests       |
| NY68 | Biscuit Brook                                            | 21 | Eastern Temperate Forests       |
| NY98 | Whiteface Mountain                                       | 21 | Eastern Temperate Forests       |
| NY99 | West Point                                               | 21 | Northern Forests                |
| OH09 | Oxford                                                   | 21 | Eastern Temperate Forests       |
| OH17 | Delaware                                                 | 21 | Eastern Temperate Forests       |
| OH49 | Caldwell                                                 | 21 | Eastern Temperate Forests       |
| OH71 | Wooster                                                  | 21 | Eastern Temperate Forests       |
| OK00 | Salt Plains National Wildlife Refuge                     | 21 | Great Plains                    |
| OK17 | Kessler Farm Field Laboratory                            | 19 | Great Plains                    |
| OK29 | Goodwell Research Station                                | 20 | Great Plains                    |
| OR02 | Alsea Guard Ranger Station                               | 18 | Marine West Coast Forest        |
| OR09 | Silver Lake Ranger Station                               | 20 | Northwestern Forested Mountains |
| OR10 | H. J. Andrews Experimental Forest                        | 21 | Northwestern Forested Mountains |
| OR18 | Starkey Experimental Forest                              | 21 | Northwestern Forested Mountains |
| OR97 | Hyslop Farm                                              | 21 | Marine West Coast Forest        |
| PA15 | Penn State                                               | 21 | Eastern Temperate Forests       |
| PA29 | Kane Experimental Forest                                 | 21 | Eastern Temperate Forests       |
| PA42 | Leading Ridge                                            | 21 | Eastern Temperate Forests       |
| PA72 | Milford                                                  | 21 | Eastern Temperate Forests       |
| SC06 | Santee National Wildlife Refuge                          | 21 | Eastern Temperate Forests       |
| SD08 | Cottonwood                                               | 21 | Great Plains                    |
| SD99 | Huron Well Field                                         | 21 | Great Plains                    |
| TN00 | Walker Branch Watershed                                  | 21 | Eastern Temperate Forests       |
| TN11 | Great Smoky Mountains National Park-Elkmont              | 21 | Eastern Temperate Forests       |
| TN14 | Hatchie National Wildlife Refuge                         | 21 | Eastern Temperate Forests       |
| TX02 | Muleshoe National Wildlife Refuge                        | 19 | Great Plains                    |
| TX03 | Beeville                                                 | 21 | Eastern Temperate Forests       |
| TX04 | Big Bend National Park - K-Bar                           | 21 | North American Deserts          |
| TX10 | Attwater Prairie Chicken National Wildlife Refuge        | 21 | Great Plains                    |
| TX16 | Sonora                                                   | 21 | Great Plains                    |
| TX21 | Longview                                                 | 21 | Eastern Temperate Forests       |
| TX22 | Guadalupe Mountains National Park Frijole Ranger Station | 21 | North American Deserts          |

|      |                                                         |    |                                 |
|------|---------------------------------------------------------|----|---------------------------------|
| TX56 | L.B.J. National Grasslands                              | 21 | Great Plains                    |
| UT01 | Logan                                                   | 21 | North American Deserts          |
| UT08 | Murphy Ridge                                            | 21 | North American Deserts          |
| UT98 | Green River                                             | 21 | North American Deserts          |
| UT99 | Bryce Canyon National Park-Repeater Hill                | 21 | North American Deserts          |
| VA00 | Charlottesville                                         | 21 | Eastern Temperate Forests       |
| VA13 | Hortons Station                                         | 21 | Eastern Temperate Forests       |
| VA28 | Shenandoah National Park-Big Meadows                    | 21 | Eastern Temperate Forests       |
| VT01 | Bennington                                              | 21 | Northern Forests                |
| VT99 | Underhill                                               | 21 | Northern Forests                |
| WA14 | Olympic National Park-Hoh Ranger Station                | 20 | Marine West Coast Forest        |
| WA19 | North Cascades National Park-Marblemount Ranger Station | 21 | Northwestern Forested Mountains |
| WA21 | La Grande                                               | 21 | Northwestern Forested Mountains |
| WA24 | Palouse Conservation Farm                               | 21 | North American Deserts          |
| WI09 | Popple River                                            | 20 | Northern Forests                |
| WI25 | Suring                                                  | 21 | Northern Forests                |
| WI28 | Lake Dubay                                              | 21 | Eastern Temperate Forests       |
| WI36 | Trout Lake                                              | 21 | Northern Forests                |
| WI37 | Spooner                                                 | 21 | Northern Forests                |
| WI98 | Wildcat Mountain                                        | 21 | Eastern Temperate Forests       |
| WI99 | Lake Geneva                                             | 21 | Eastern Temperate Forests       |
| WV04 | Babcock State Park                                      | 21 | Eastern Temperate Forests       |
| WV18 | Parsons                                                 | 21 | Eastern Temperate Forests       |
| WY00 | Snowy Range                                             | 21 | Northwestern Forested Mountains |
| WY02 | Sinks Canyon                                            | 21 | North American Deserts          |
| WY06 | Pinedale                                                | 21 | Northwestern Forested Mountains |
| WY08 | Yellowstone National Park-Tower Falls                   | 21 | Northwestern Forested Mountains |
| WY95 | Brooklyn Lake                                           | 18 | Northwestern Forested Mountains |
| WY97 | South Pass City                                         | 20 | Northwestern Forested Mountains |
| WY98 | Gypsum Creek                                            | 21 | North American Deserts          |
| WY99 | Newcastle                                               | 21 | Great Plains                    |

Table S3. Location of the CASTNET observation networks with years of valid data, the longitudes and latitudes of these stations.

| Site ID | Valid Years | Longitude | Latitude |
|---------|-------------|-----------|----------|
| ALH157  | 20          | -89.6228  | 38.869   |
| ANA115  | 19          | -83.9022  | 42.4166  |
| ARE128  | 21          | -77.3079  | 39.9232  |
| ASH135  | 19          | -68.4132  | 46.6038  |
| BEL116  | 18          | -76.8171  | 39.0282  |
| BVL130  | 19          | -88.3725  | 40.052   |
| CAD150  | 18          | -93.0988  | 34.1793  |
| CDR119  | 20          | -80.8477  | 38.8795  |
| CHA467  | 21          | -109.389  | 32.0094  |
| CND125  | 19          | -79.8375  | 35.2633  |
| CNT169  | 21          | -106.24   | 41.3645  |
| COW137  | 21          | -83.4303  | 35.0605  |
| CTH110  | 20          | -76.6535  | 42.4009  |
| CVL151  | 18          | -89.7992  | 34.0027  |
| DCP114  | 19          | -83.2606  | 39.6359  |
| ESP127  | 19          | -85.733   | 36.0389  |
| GAS153  | 20          | -84.4101  | 33.1812  |
| GLR468  | 21          | -113.997  | 48.5103  |
| GRC474  | 21          | -112.184  | 36.0586  |
| GTH161  | 21          | -106.986  | 38.9563  |
| KEF112  | 18          | -78.7679  | 41.5981  |
| LRL117  | 19          | -79.2516  | 39.9883  |
| LYK123  | 19          | -82.9982  | 40.917   |
| MKG113  | 19          | -80.1452  | 41.4268  |
| OXF122  | 21          | -84.7235  | 39.5311  |
| PAR107  | 21          | -79.6617  | 39.0904  |
| PND165  | 20          | -109.788  | 42.929   |
| PNF126  | 19          | -82.045   | 36.1054  |
| PRK134  | 21          | -90.5972  | 45.2065  |
| PSU106  | 21          | -77.9318  | 40.7209  |
| SAL133  | 19          | -85.6614  | 40.816   |
| SHN418  | 20          | -78.4347  | 38.5231  |
| SPD111  | 18          | -83.8265  | 36.4698  |
| SUM156  | 21          | -84.9904  | 30.1102  |
| UVL124  | 19          | -83.3599  | 43.6136  |
| VIN140  | 21          | -87.4849  | 38.7408  |
| VPI120  | 20          | -80.5575  | 37.3298  |
| WSP144  | 20          | -74.8727  | 40.3123  |
| WST109  | 20          | -71.7008  | 43.9445  |

Table S4. The normalized mean bias (NMB, %) between the model and the NADP sites from 2002 to 2006 from Appel et al. (2011) and this study including both precipitation adjustment and without precipitation adjustment.

|             |                      | <b>TNO<sub>3</sub></b> | <b>NH<sub>x</sub></b> | <b>TS</b> |
|-------------|----------------------|------------------------|-----------------------|-----------|
| <b>East</b> | Appel et al., 2011   | -21.9                  | -15.2                 | 0.8       |
|             | No adjustment        | -37.0                  | -33.4                 | -8.7      |
|             | Annual Precip-adjust | -39.6                  | -36.5                 | -12.0     |
| <b>West</b> | Appel et al., 2011   | -7.6                   | -15.7                 | 18.9      |
|             | No adjustment        | -23.0                  | -30.3                 | 48.1      |
|             | Annual Precip-adjust | -22.3                  | -31.7                 | 58.5      |

Table S5. The trends for the wet deposition (WDEP, units of kg N ha<sup>-1</sup> yr<sup>-1</sup> for nitrogen deposition including TNO<sub>3</sub>, NH<sub>x</sub> and TIN, and kg S ha<sup>-1</sup> yr<sup>-1</sup> for TS) over the ten ecoregions. The bolded values mean the trends are statistically significant with the P value less than 0.05 for the Student's t-test.

| ID | Region Name                     | TNO <sub>3</sub> | NH <sub>x</sub> | TIN           | TS            |
|----|---------------------------------|------------------|-----------------|---------------|---------------|
| 5  | Northern Forests                | <b>-0.036</b>    | -0.002          | <b>-0.037</b> | <b>-0.088</b> |
| 6  | Northwestern Forested Mountains | <b>-0.006</b>    | 0.002           | -0.004        | <b>-0.008</b> |
| 7  | Marine West Coast Forest        | -0.002           | 0.007           | 0.005         | 0.005         |
| 8  | Eastern Temperate Forests       | <b>-0.065</b>    | -0.005          | <b>-0.070</b> | <b>-0.18</b>  |
| 9  | Great Plains                    | <b>-0.022</b>    | -0.001          | <b>-0.023</b> | <b>-0.037</b> |
| 10 | North American Deserts          | <b>-0.007</b>    | 0.00            | <b>-0.007</b> | <b>-0.013</b> |
| 11 | Mediterranean California        | -0.006           | 0.00            | -0.006        | 0.002         |
| 12 | Southern Semi-arid Highlands    | <b>-0.014</b>    | -0.007          | <b>-0.021</b> | <b>-0.049</b> |
| 13 | Temperate Sierras               | <b>-0.011</b>    | -0.001          | <b>-0.012</b> | <b>-0.034</b> |
| 15 | Tropical Wet Forests            | <b>-0.023</b>    | <b>0.011</b>    | -0.012        | <b>-0.036</b> |

Table S6. The same as Table S5 but for dry deposition (DDEP, units of kg N ha<sup>-1</sup> yr<sup>-1</sup> for nitrogen deposition including TNO<sub>3</sub>, NH<sub>x</sub> and TIN, and kg S ha<sup>-1</sup> yr<sup>-1</sup> for TS) over the ten ecoregions.

| ID | Region Name                     | TNO <sub>3</sub> | NH <sub>x</sub> | TIN           | TS            |
|----|---------------------------------|------------------|-----------------|---------------|---------------|
| 5  | Northern Forests                | <b>-0.051</b>    | <b>0.018</b>    | <b>-0.033</b> | <b>-0.15</b>  |
| 6  | Northwestern Forested Mountains | <b>-0.007</b>    | <b>0.009</b>    | 0.002         | <b>-0.013</b> |
| 7  | Marine West Coast Forest        | <b>-0.016</b>    | -0.005          | <b>-0.022</b> | <b>-0.058</b> |
| 8  | Eastern Temperate Forests       | <b>-0.088</b>    | <b>0.039</b>    | <b>-0.049</b> | <b>-0.33</b>  |
| 9  | Great Plains                    | <b>-0.019</b>    | <b>0.045</b>    | <b>0.026</b>  | <b>-0.045</b> |
| 10 | North American Deserts          | <b>-0.009</b>    | <b>0.009</b>    | -0.001        | <b>-0.011</b> |
| 11 | Mediterranean California        | <b>-0.045</b>    | 0.012           | <b>-0.032</b> | <b>-0.016</b> |
| 12 | Southern Semi-arid Highlands    | 0.001            | <b>0.009</b>    | <b>0.009</b>  | <b>-0.025</b> |
| 13 | Temperate Sierras               | -0.005           | <b>0.010</b>    | 0.005         | <b>-0.02</b>  |
| 15 | Tropical Wet Forests            | -0.004           | <b>0.030</b>    | <b>0.027</b>  | <b>-0.019</b> |
